# Supplementary material for: Emergency Department/Urgent Care as Usual Source of Care and Clinical Outcomes in CKD: Findings From the Chronic Renal Insufficiency Cohort Study
Source: PubMed Central journal article supplement — Kidney Med. 2022 Feb 1;4(4):100424. doi: 10.1016/j.xkme.2022.100424 (PMC8971310; doi:10.1016/j.xkme.2022.100424), 2022-02-01
Supplement: mmc1.pdf [file mmc1.pdf]

**Figure S1.** Overall and Time-Dependent Hazard Ratios of Atherosclerotic Events for Usual Source of Care



**Table S1.** Number of Missing Data by Usual Source of Care\*

| <b>Characteristic</b>                     | <b>Overall<br/>(n=3140)</b> | <b>Clinic<br/>(n=2862)</b> | <b>Emergency<br/>Department /<br/>Urgent Care<br/>(n=278)</b> |
|-------------------------------------------|-----------------------------|----------------------------|---------------------------------------------------------------|
| Less than high school education           | 2 (0.0006)                  | 1 (0.0003)                 | 1 (0.004)                                                     |
| Health insurance                          | 83 (0.001)                  | 71 (0.02)                  | 12 (0.04)                                                     |
| Unable to fill a prescription due to cost | 7 (0.002)                   | 7 (0.002)                  | 0 (0)                                                         |
| Unable to see a doctor due to cost        | 7 (0.002)                   | 7 (0.002)                  | 0 (0)                                                         |
| Hypertension                              | 6 (0.002)                   | 6 (0.002)                  | 0 (0)                                                         |
| ACEI/ARB                                  | 47 (0.01)                   | 41 (0.01)                  | 6 (0.02)                                                      |
| Hypertension                              | 47 (0.01)                   | 41 (0.01)                  | 6 (0.02)                                                      |
| Diabetes                                  | 47 (0.01)                   | 41 (0.01)                  | 6 (0.02)                                                      |
| Ideal physical activity†                  | 65 (0.02)                   | 59 (0.02)                  | 6 (0.02)                                                      |
| Blood Pressure <140/90, mm Hg             | 147 (0.05)                  | 130 (0.04)                 | 17 (0.06)                                                     |
| BMI, kg/m <sup>2</sup>                    | 204 (0.06)                  | 180 (0.06)                 | 24 (0.09)                                                     |
| Hemoglobin A1c <7%                        | 208 (0.07)                  | 186 (0.06)                 | 22 (0.08)                                                     |
| eGFR, mL/min per 1.73 m <sup>2</sup>      | 127 (0.04)                  | 110 (0.04)                 | 17 (0.06)                                                     |
| Urine protein, mg/24 h                    | 318 (0.1)                   | 285 (0.1)                  | 33 (0.1)                                                      |

\*There was no missing data for all of the other variables in Table 1. All variables presented as n, (%).

**Table S2.** Baseline Characteristics for Those Included Vs Not Included in Regression Analyses

| <b>Characteristic</b>                            | <b>Included in Regression Analysis<br/>(n=2,692)</b> | <b>Not Included in Regression Analysis<br/>(n=448)</b> |
|--------------------------------------------------|------------------------------------------------------|--------------------------------------------------------|
| Age, years, mean (SD)                            | 65.3 (9.3)                                           | 66.0 (10.0)                                            |
| Female sex                                       | 1153 (42.8%)                                         | 227 (50.7%)                                            |
| Race/Ethnicity                                   |                                                      |                                                        |
| Non-Hispanic White                               | 1231 (45.7%)                                         | 190 (42.4%)                                            |
| Non-Hispanic Black                               | 1143 (42.5%)                                         | 201 (44.9%)                                            |
| Hispanic                                         | 230 (8.5%)                                           | 43 (9.6%)                                              |
| Other                                            | 88 (3.3%)                                            | 14 (3.1%)                                              |
| Less than high school education                  | 386 (14.3%)                                          | 71 (15.9%)                                             |
| Annual income <\$20,000                          | 659 (24.5%)                                          | 125 (27.9%)                                            |
| Health insurance                                 | 2539 (96.7%)                                         | 414 (96.3%)                                            |
| Health insurance type                            |                                                      |                                                        |
| Private/Commercial                               | 551 (21%)                                            | 65 (15.1%)                                             |
| Any Medicare                                     | 1093 (41.6%)                                         | 176 (40.9%)                                            |
| Medicaid/Public aid                              | 331 (12.6%)                                          | 76 (17.7%)                                             |
| Veterans Affairs/Military/CHAMPUS                | 167 (6.4%)                                           | 21 (4.9%)                                              |
| None                                             | 167 (6.4%)                                           | 21 (4.9%)                                              |
| Unknown                                          | 397 (15.1%)                                          | 76 (17.7%)                                             |
| Unable to fill a prescription due to cost        | 481 (17.9%)                                          | 80 (17.9%)                                             |
| Unable to see a doctor due to cost               | 224 (8.3%)                                           | 42 (9.4%)                                              |
| Ever seen a nephrologist (yes)                   | 1860 (69.1%)                                         | 344 (76.8%)                                            |
| Marital Status                                   |                                                      |                                                        |
| Currently married                                | 1479 (54.9%)                                         | 226 (50.4%)                                            |
| Never married                                    | 359 (13.3%)                                          | 66 (14.7%)                                             |
| Formerly married                                 | 854 (31.7%)                                          | 156 (34.8%)                                            |
| Employment Status                                |                                                      |                                                        |
| Full-time employed                               | 743 (27.6%)                                          | 108 (24.1%)                                            |
| Part-time employed                               | 280 (10.4%)                                          | 41 (9.2%)                                              |
| Permanently disabled                             | 440 (16.3%)                                          | 75 (16.7%)                                             |
| Retired                                          | 981 (36.4%)                                          | 174 (38.8%)                                            |
| Unemployed                                       | 139 (5.2%)                                           | 27 (6%)                                                |
| Hypertension                                     | 2424 (90%)                                           | 414 (93.7%)                                            |
| Diabetes                                         | 1445 (53.7%)                                         | 226 (50.4%)                                            |
| Cardiovascular disease                           | 969 (36%)                                            | 198 (44.2%)                                            |
| Current Smoker                                   | 246 (9.1%)                                           | 38 (8.5%)                                              |
| ACEI/ARB                                         | 1763 (65.5%)                                         | 263 (65.6%)                                            |
| Ideal physical activity <sup>β</sup>             | 1366 (50.7%)                                         | 186 (48.6%)                                            |
| Blood Pressure <140/90, mm Hg                    | 2082 (77.3%)                                         | 205 (68.1%)                                            |
| BMI, kg/m <sup>2</sup> , mean (SD)               | 32.16 (7.18)                                         | 33.43 (8.64)                                           |
| Hemoglobin A1c <7%                               | 1943 (72.2%)                                         | 171 (71.3%)                                            |
| eGFR, mL/min per 1.73 m <sup>2</sup> , mean (SD) | 49.93 (17.30)                                        | 49.32 (17.42)                                          |

|                                            |                  |                  |
|--------------------------------------------|------------------|------------------|
| CKD Stage (per mL/min/1.73m <sup>2</sup> ) |                  |                  |
| Stage 2 (eGFR ≥60)                         | 744 (28)         | 89 (28)          |
| Stage 3a (eGFR 45-59)                      | 891 (33)         | 112 (35)         |
| Stage 3b (eGFR 30-44)                      | 704 (26)         | 77 (24)          |
| Stage 4 (eGFR <30)                         | 353 (13)         | 43 (13)          |
| Urine protein, mg/24 h, median (IQR)       | 0.2(0.08 - 0.69) | 0.2(0.09 - 1.03) |

\*p<0.05

Data presented as n (%) unless otherwise noted.

<sup>β</sup> ≥150 minutes/week vigorous activity ≥75 minutes/week, or moderate plus vigorous activity ≥150 minutes/week.<sup>44</sup>

Abbreviations: SD, standard deviation; CHAMPUS, Civilian Health and Medical Program of the Uniformed Services; eGFR, estimated glomerular filtration rate; ACE/ARB, angiotensin converting enzyme inhibitor/angiotensin II receptor blocker; IQR, interquartile range.

**Table S3.** Stratified Association Between Usual Source of Care and Hospitalizations by eGFR Categories

| eGFR Category, ml/min/1.73 m <sup>2</sup>  |                | No. of Events | Event Rate per 1,000 person years (95%CI) | Rate Ratio (95% CI) |
|--------------------------------------------|----------------|---------------|-------------------------------------------|---------------------|
| <b>All-Cause Hospitalizations</b>          |                |               |                                           |                     |
| ≥60                                        | Clinic         | 1292          | 478.0 (452.6-504.8)                       | Referent            |
|                                            | ED/urgent care | 337           | 1453.0 (1305.8-1616.7)                    | 1.91 (1.66, 2.20)   |
| 45-<60                                     | Clinic         | 2230          | 688.0 (660.0-717.1)                       | Referent            |
|                                            | ED/urgent care | 369           | 1521.2 (1373.6-1684.6)                    | 1.56 (1.37, 1.77)   |
| 30-<45                                     | Clinic         | 1855          | 754.7 (721.2-789.9)                       | Referent            |
|                                            | ED/urgent care | 294           | 1101.4 (982.4-1234.8)                     | 1.06 (0.92, 1.22)   |
| <30                                        | Clinic         | 1221          | 994.6 (940.3-1052.0)                      | Referent            |
|                                            | ED/urgent care | 173           | 1598.3 (1377.0-1855.1)                    | 1.06 (0.87, 1.28)   |
| <b>Non-Cardiovascular Hospitalizations</b> |                |               |                                           |                     |
| ≥60                                        | Clinic         | 1036          | 383.3 (360.6-407.3)                       | Referent            |
|                                            | ED/urgent care | 250           | 1077.9 (952.2-1220.1)                     | 1.83 (1.56, 2.16)   |
| 45-<60                                     | Clinic         | 1782          | 549.8 (524.8-575.9)                       | Referent            |
|                                            | ED/urgent care | 294           | 1212.0 (1081.1-1358.8)                    | 1.66 (1.45, 1.91)   |
| 30-<45                                     | Clinic         | 1472          | 598.9 (569.1-630.3)                       | Referent            |
|                                            | ED/urgent care | 221           | 827.9 (725.7-944.6)                       | 1.08 (0.92, 1.27)   |
| <30                                        | Clinic         | 950           | 773.8 (726.2-824.6)                       | Referent            |
|                                            | ED/urgent care | 144           | 1330.3 (1129.9-1566.4)                    | 1.17 (0.95, 1.44)   |
| <b>Cardiovascular Hospitalizations</b>     |                |               |                                           |                     |
| ≥60                                        | Clinic         | 256           | 94.7 (83.8-107.1)                         | Referent            |
|                                            | ED/urgent care | 87            | 375.1 (304.0-462.8)                       | 2.21 (1.64, 2.99)   |
| 45-<60                                     | Clinic         | 448           | 138.2 (126.0-151.6)                       | Referent            |
|                                            | ED/urgent care | 75            | 309.2 (246.6-387.7)                       | 1.17 (0.86, 1.60)   |
| 30-<45                                     | Clinic         | 383           | 155.8 (141.0-172.3)                       | Referent            |
|                                            | ED/urgent care | 73            | 273.5 (217.4-344.0)                       | 0.97 (0.72, 1.30)   |
| <30                                        | Clinic         | 271           | 220.7 (196.0-248.7)                       | Referent            |
|                                            | ED/urgent care | 29            | 267.9 (186.2-385.5)                       | 0.74 (0.48, 1.15)   |

Adjusted for clinical center, enrollment phase, age, sex, race, ethnicity, education, income, hemoglobin A1c, statin, aspirin, ACEI/ARB, smoking, physical activity, blood pressure <140/90 mmHg, eGFR and log urine protein

**Table S4.** Association Between Usual Source of Care and Hospitalizations Using Negative Binomial Regression

| Hospitalizations          | No. of Events | Event Rate per 1,000 person years (95%CI) | Rate Ratio (95% CI) |                   |                   |
|---------------------------|---------------|-------------------------------------------|---------------------|-------------------|-------------------|
|                           |               |                                           | Model 1             | Model 2           | Model 3           |
| <b>All-Cause</b>          |               |                                           |                     |                   |                   |
| Clinic                    | 6,751         | 680 (664-696)                             | Referent            | Referent          | Referent          |
| ED/urgent care            | 1,206         | 1,341 (1,268-1,419)                       | 1.99 (1.68-2.35)    | 1.43 (1.21, 1.68) | 1.48 (1.25, 1.75) |
| <b>Non-Cardiovascular</b> |               |                                           |                     |                   |                   |
| Clinic                    | 5,365         | 540 (526-555)                             | Referent            | Referent          | Referent          |
| ED/urgent care            | 936           | 1,040 (976-1110)                          | 1.92 (1.62-2.27)    | 1.38 (1.16, 1.63) | 1.46 (1.22, 1.74) |
| <b>Cardiovascular</b>     |               |                                           |                     |                   |                   |
| Clinic                    | 1,386         | 140 (132-147)                             | Referent            | Referent          | Referent          |
| ED/urgent care            | 270           | 300 (267-338)                             | 2.25 (1.74-2.92)    | 1.62 (1.26, 2.09) | 1.57 (1.20, 2.06) |

Model 1: Unadjusted

Model 2: clinical center, enrollment phase, age, sex, race, ethnicity, education, income,

Model 3: 2 + hemoglobin A1c, statin, aspirin, ACEI/ARB, smoking status, physical activity, blood pressure <140/90 mmHg, eGFR, log urine protein
